# Supplementary material
Source: publisher site journal article supplement (https://www.spandidos-publications.com/3661/downloadSupplementary)

Figure S1. Schematic diagram of the mechanism of blocking MBD2 to restore SFRP gene expression. MBD2, methyl-CpG binding domain protein 2; SFRP, secreted frizzled related protein.

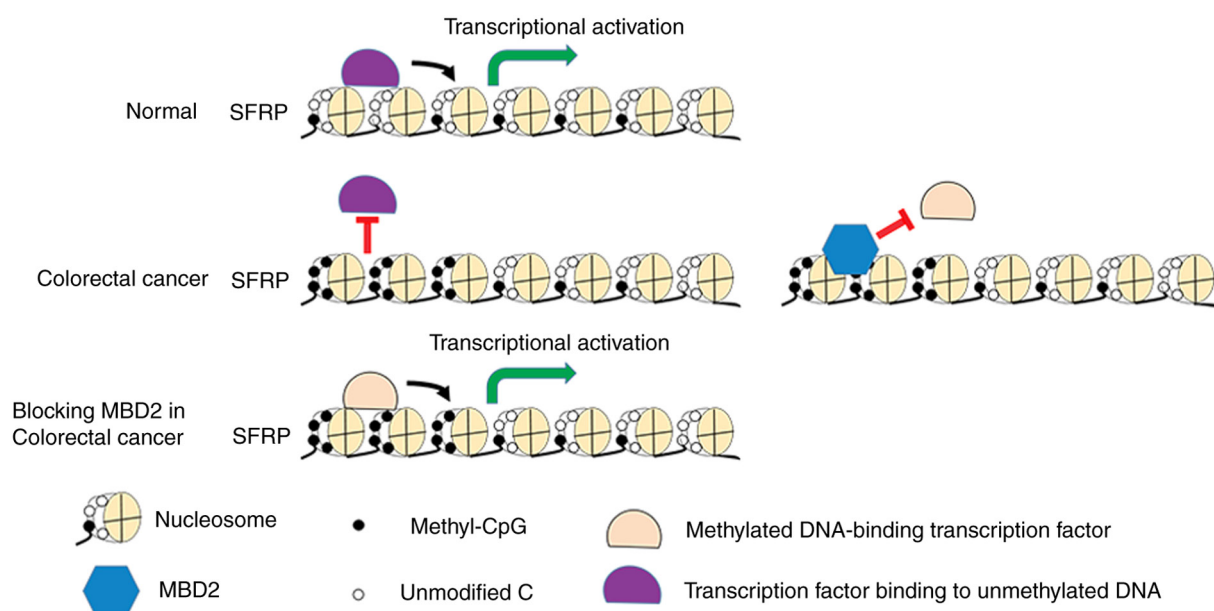

Supplement: Supplementary file 1 [file downloadSupplementary]
